# Supplementary material
Source: Research Square preprint supplement (doi:10.21203/rs.3.rs-9965158/v1)
Supplement: Supplementary file 1 [file 7351c61b37c198e8c7e30f1c.docx]

This supplements to:

**Subnational Inequities in Measles Vaccination Coverage in Kenya: A Bayesian Geostatistical Modelling Analysis**

Brian Njuguna1#, Nyamai Mutono1,2,Rose Jalang’o3, Stanley Sayianka1, Emmanuel Okunga4, George P. Omondi1, Helen Kiarie5, Teresia N. Kimani1, Marybeth C. Maritim1,6 Claudio Fronterre7,8, Loice Ombajo1,6, SM Thumbi1,2

1 Centre for Epidemiological Modelling and Analysis, University of Nairobi, Nairobi, Kenya

2 Paul G Allen School for Global Health, Washington State University, Pullman, USA

3 National Vaccines Immunization Program, Ministry of Health, Nairobi, Kenya

4 Kenya National Public Health Institute, Nairobi, Kenya

5 Division of Monitoring and Evaluation, Ministry of Health, Nairobi, Kenya

6 Department of Medicine and Therapeutics, Faculty of Health Sciences, University of Nairobi, Nairobi, Kenya

7Department of Applied Health Sciences, University of Birmingham, United Kingdom

8CHICAS, Lancaster Medical School, Lancaster University, United Kingdom

# Corresponding author; [brian.njuguna@cema.africa](mailto:brian.njuguna@cema.africa)

**Table S1: Covariates and Data sources**

|  | **Covariate** | **Timeline** | **Time extent** | **units** | **Resolution** | **Source** |
| --- | --- | --- | --- | --- | --- | --- |
|  | Population density | Static | 2020 | - | 100M | [WordlPop](https://hub.worldpop.org/geodata/summary?id=41977) [1] |
|  | Population age structures | Static | 2020 | counts | 100M | [WorldPop](https://hub.worldpop.org/geodata/summary?id=17004) [2] |
|  | Land Surface Temperature in the Day | Temporal | 2019-2024 | K | 5KM | [MODIS](https://lpdaac.usgs.gov/products/mod11a2v061/) [3] |
|  | Night light | Static | 2016 | nanoWatts/cm2/sr | 100M | [WorldPOP](https://hub.worldpop.org/geodata/summary?id=18647) [4] |
|  | Travel time to cities (20,000 - 50,000) | Static | 2015 | minutes | 1KM | [CGIR](https://figshare.com/articles/dataset/Travel_time_to_cities_and_ports_in_the_year_2015/7638134/3) [5] |
|  | Motorized Travel time to health facilities | Static | 2020 | Minutes | 1KM | [Malaria Atlas](https://malariaatlas.org/project-resources/accessibility-to-healthcare/) [6] |
|  | Precipitation | Temporal | 2019-2024 | mm/d | 5KM | [CHIRPS](https://chc.ucsb.edu/data/chirps) [7] |
|  | Percentage of women age 15−49 who are literate | Static | 2022 | % | 5KM | [DHS Modelled surfaces](https://spatialdata.dhsprogram.com/modeled-surfaces/#survey=KE|2022|DHS) [8] |
|  | Percentage of men age 15−49 who are literate | Static | 2022 | % | 5KM | [DHS Modelled surfaces](https://spatialdata.dhsprogram.com/modeled-surfaces/#survey=KE|2022|DHS) [9] |
|  | Percentage of population practicing open defecation | Static | 2022 | % | 5KM | [DHS Modelled surfaces](https://spatialdata.dhsprogram.com/modeled-surfaces/#survey=KE|2022|DHS) [10] |
|  | Percentage of live births in a health facility | Static | 2022 | % | 5KM | [DHS Modelled surfaces](https://spatialdata.dhsprogram.com/modeled-surfaces/#survey=KE|2022|DHS) [11] |
|  | Percentage of children 12−23 months who had received Pneumococcal 3 vaccination | Static | 2022 | % | 5KM | [DHS Modelled surfaces](https://spatialdata.dhsprogram.com/modeled-surfaces/#survey=KE|2022|DHS) [12] |
|  | Percentage of children 12−23 months who had received a third dose of DPT | Static | 2022 | % | 5KM | [DHS Modelled surfaces](https://spatialdata.dhsprogram.com/modeled-surfaces/#survey=KE|2022|DHS) [13] |
|  | Percentage of children 12−23 months who had received first dose of DPT | Static | 2022 | % | 5KM | [DHS Modelled surfaces](https://spatialdata.dhsprogram.com/modeled-surfaces/#survey=KE|2022|DHS) [14] |
|  | Percentage of children 12−23 months with a vaccination card | Static | 2022 | % | 5KM | [DHS Modelled surfaces](https://spatialdata.dhsprogram.com/modeled-surfaces/#survey=KE|2022|DHS) [15] |
|  | Proportion of population in the lowest wealth quantile | Static | 2022 | - | 5KM | [Bayesian geostatistical model](https://www.researchsquare.com/article/rs-8967363/v1)[16] |
|  | Facility density | Static | 2023 | - | 5KM | [Kenya Health Facility Census 2023](https://www.health.go.ke/sites/default/files/2024-01/Kenya%20Health%20Facility%20Census%20Report%20September%202023.pdf)[17] |
|  | Nurse density | Static | 2023 | - | 5KM | [Kenya Health Facility Census 2023](https://www.health.go.ke/sites/default/files/2024-01/Kenya%20Health%20Facility%20Census%20Report%20September%202023.pdf)[17] |

**Table S2: Covariates selected using the backward-stepwise algorithm**

|  | **MCV1** | **MCV2** |
| --- | --- | --- |
|  | Percentage of children 12−23 months who had received first dose of DPT | Percentage of children 12−23 months who had received first dose of DPT |
|  | Percentage of women aged 15−49 who are literate | Percentage of women aged 15−49 who are literate |
|  | Proportion of population in the lowest wealth quintile | Proportion of population in the lowest wealth quintile |
|  | Population density | Percentage of children 12−23 months who had received Pneumococcal 3 vaccination |
|  | Motorized travel time to health facilities | Facility density |
|  | Urbanicity | Population density |
|  |  | Motorized Travel time to health facilities |
|  |  | Urbanicity |

**Model Validation**

We assessed model calibration by comparing population-weighted estimates from the two models against design-adjusted estimates (Figures S1c and d in the main paper). We also examined potential violations of the assumed spatial correlation structure using the approach described in *Peter J. Diggle and Emanuele Giorgi,* in their book *Model-based Geostatistics for Global Public Health*18. Figure S1c and d shows the empirical variogram diagnostic plots to check the compatibility of the data and the model assumed, specifically the spatial autocorrelation function. These plots compare the observed spatial correlation structure in the residuals (black points) against the expected variogram behavior under the fitted model. The blue shaded envelope represents the range of variogram values obtained from 1000 posterior predictive samples, while the dashed lines indicate the 2.5% and 97.5% quantiles of this posterior distribution. When the observed empirical variogram points fall within this posterior envelope, it indicates that the assumed correlation function adequately captures the true spatial correlation structure in the data. Both panels demonstrate good model compatibility, with the observed variogram points lying well within the credible intervals.


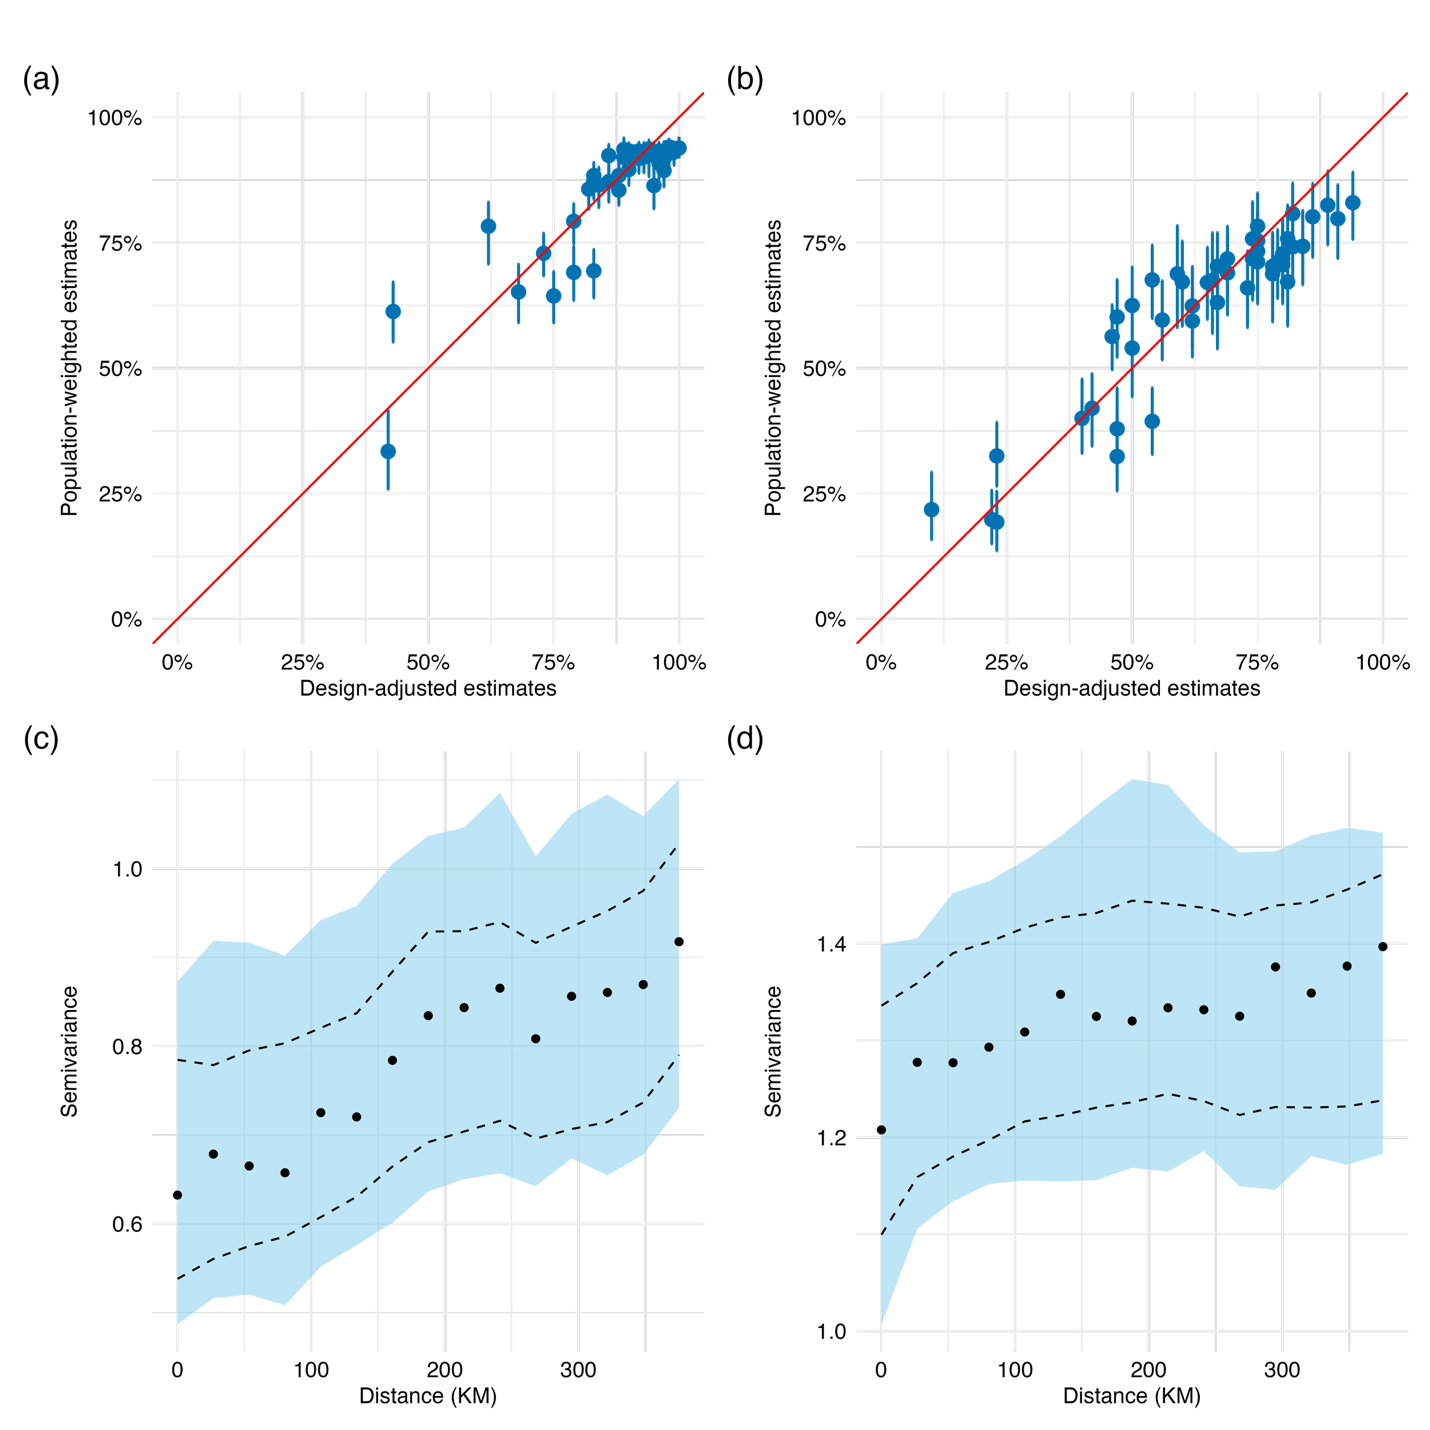


Figure S1: Figures 1a and S1b show model calibration assessment comparing population-weighted estimates against design-adjusted estimates for MCV1 (panel a) and MCV2 (panel b) vaccination coverage. Figures S1c and d represents the empirical variogram for MCV1 (panel c) and MCV2 (panel d)

**Table S3: Model validation metrics**

| **Vaccine** |  | **RMSE** | **MAE** | **MSE** |
| --- | --- | --- | --- | --- |
| MCV1 |  | 0.247 | 0.164 | 0.061 |
|  | 0.218 | 0.145 | 0.047 |
|  | 0.231 | 0.155 | 0.053 |
|  | 0.224 | 0.154 | 0.050 |
| **Average** | **0.230** | **0.154** | **0.053** |
| MCV2 |  | 0.355 | 0.294 | 0.126 |
|  | 0.328 | 0.279 | 0.108 |
|  | 0.348 | 0.290 | 0.121 |
|  | 0.335 | 0.281 | 0.112 |
| **Average** | **0.342** | **0.286** | **0.117** |

**Model Calibration Assessment**

We assessed the calibration of the fitted geostatistical model using the average non-randomized Probability Integral Transform (AnPIT), originally proposed by Czado et al. (2009) and adapted to binomial geostatistical models by Giorgi et al. (2021)19,20. The AnPIT evaluates whether the predictive distribution of the fitted model adequately reflects the observed data. For a well-calibrated model, the AnPIT curve follows the 45-degree identity line when plotted against .

We randomly held out 30% of survey clusters as a test set, refitting the model on the remaining 70%, and repeated this procedure 10 times with different random seeds. The AnPIT reported is the mean across the 10 replicates. A 95% predictive envelope was constructed under the null hypothesis of a well-calibrated model by simulating 1,000 datasets from the fitted predictive distribution at each replicate, with the reported envelope being the mean lower and upper bounds across replicates.


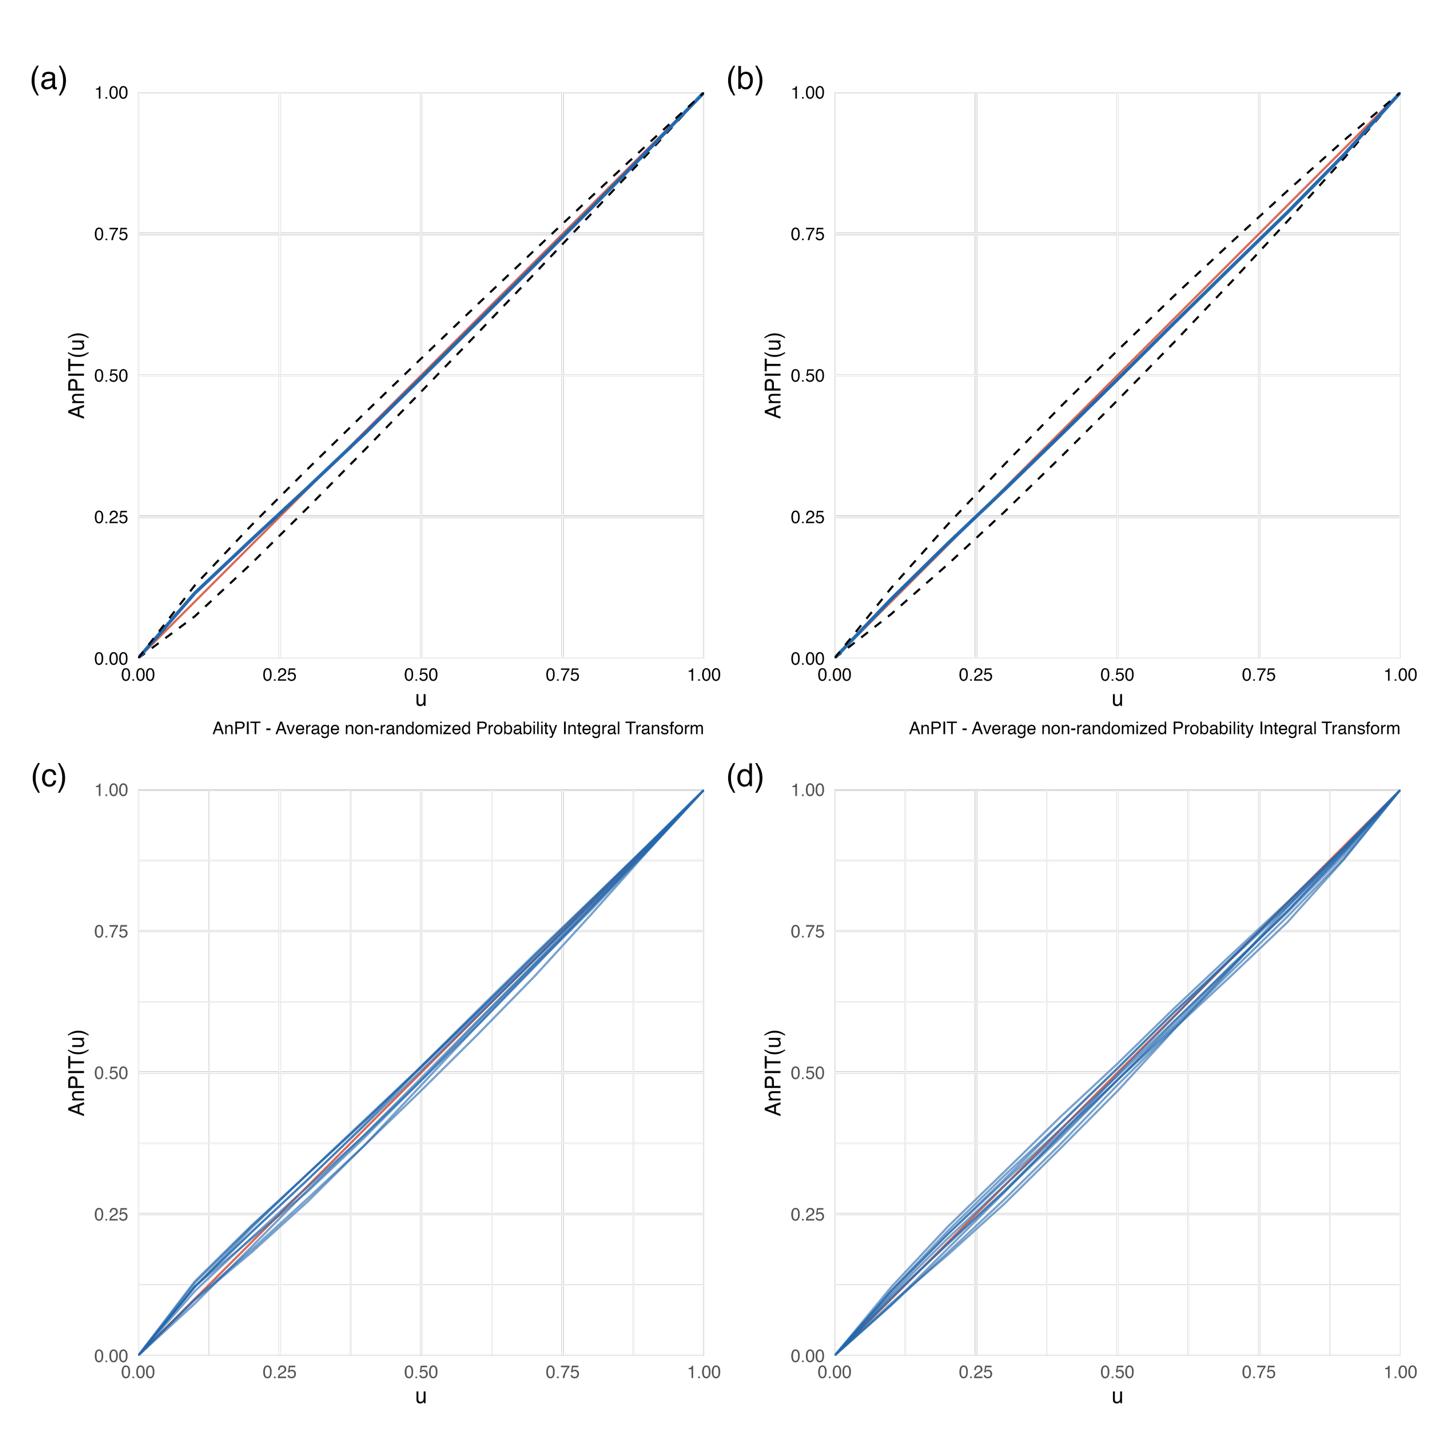


Figure S2: Average non-randomized Probability Integral Transform (AnPIT) for MCV1 and MCV2 geostatistical models. Upper panels show the mean AnPIT curve (blue) averaged across 10 replicates with the 95% predictive envelope (dashed lines) for MCV1 (a) and MCV2 (b). Lower panels show the individual AnPIT curves from each of the 10 replicates for MCV1 (c) and MCV2 (d). The red diagonal line represents the identity line, corresponding to a perfectly calibrated model. AnPIT curves lying within the predictive envelope and close to the identity line indicate good model calibration.


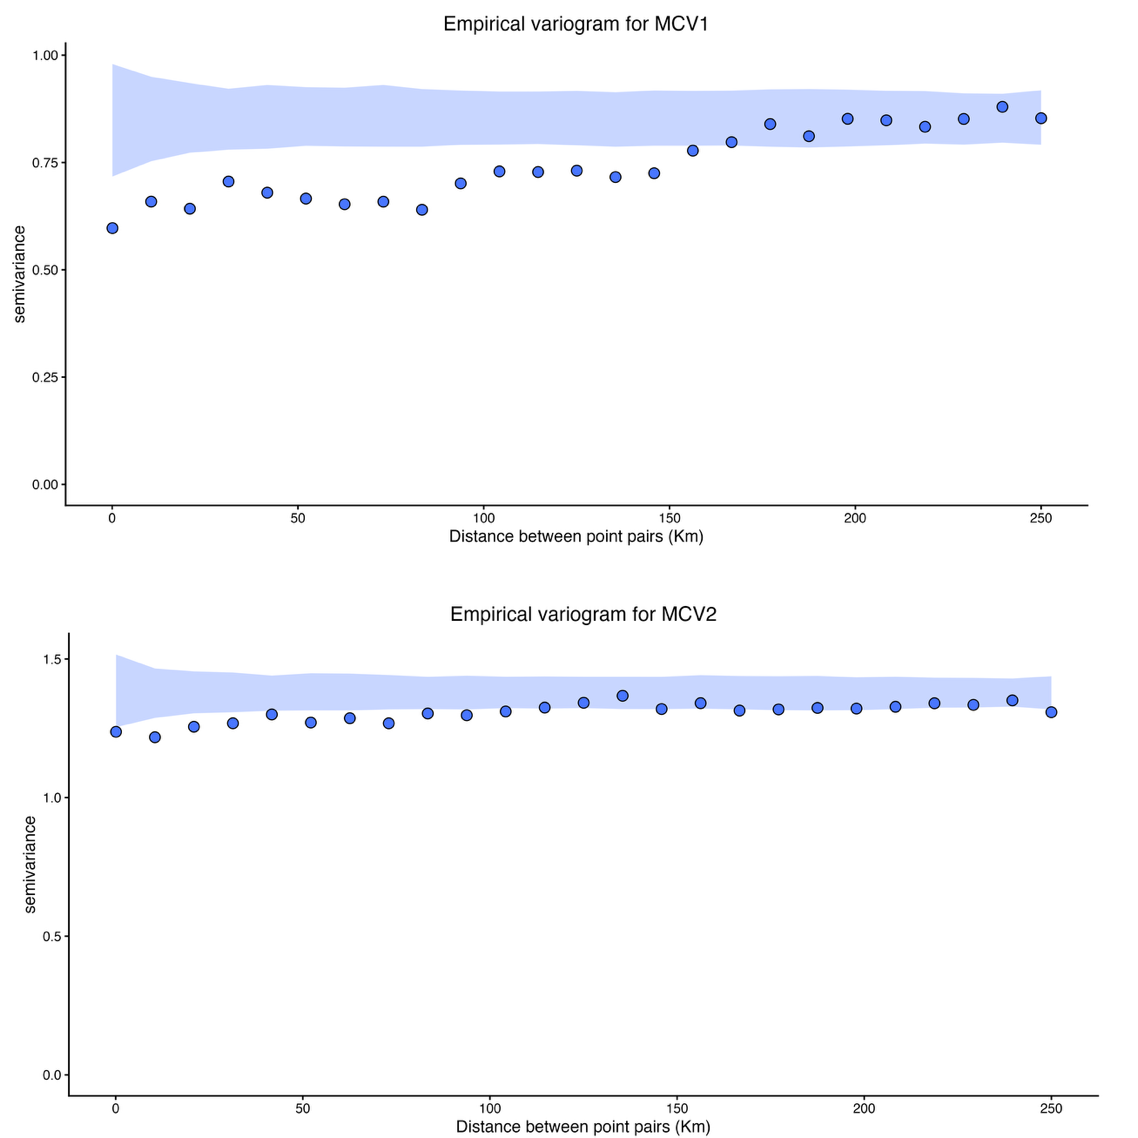


Figure S3: Empirical variograms for MCV1 and MCV2

**Model hyperparameters**

**Table S4: MCV1 model hyperparameters**

|  | Posterior mean | Lower credible interval | Upper credible interval |
| --- | --- | --- | --- |
| Spatial range | 165.97 | 25.87 | 662.5 |
| Spatial variance | 0.06 | 0 | 0.5 |
| Nugget | 0.74 | 0.43 | 1.2 |

**Table S5: MCV2 model hyperparameters**

|  | Posterior mean | Lower credible interval | Upper credible interval |
| --- | --- | --- | --- |
| Spatial range | 97.48 | 38.92 | 197.99 |
| Spatial variance | 0.35 | 0.19 | 0.58 |
| Nugget | 0.16 | 0.04 | 0.38 |

**Within county heterogenity**


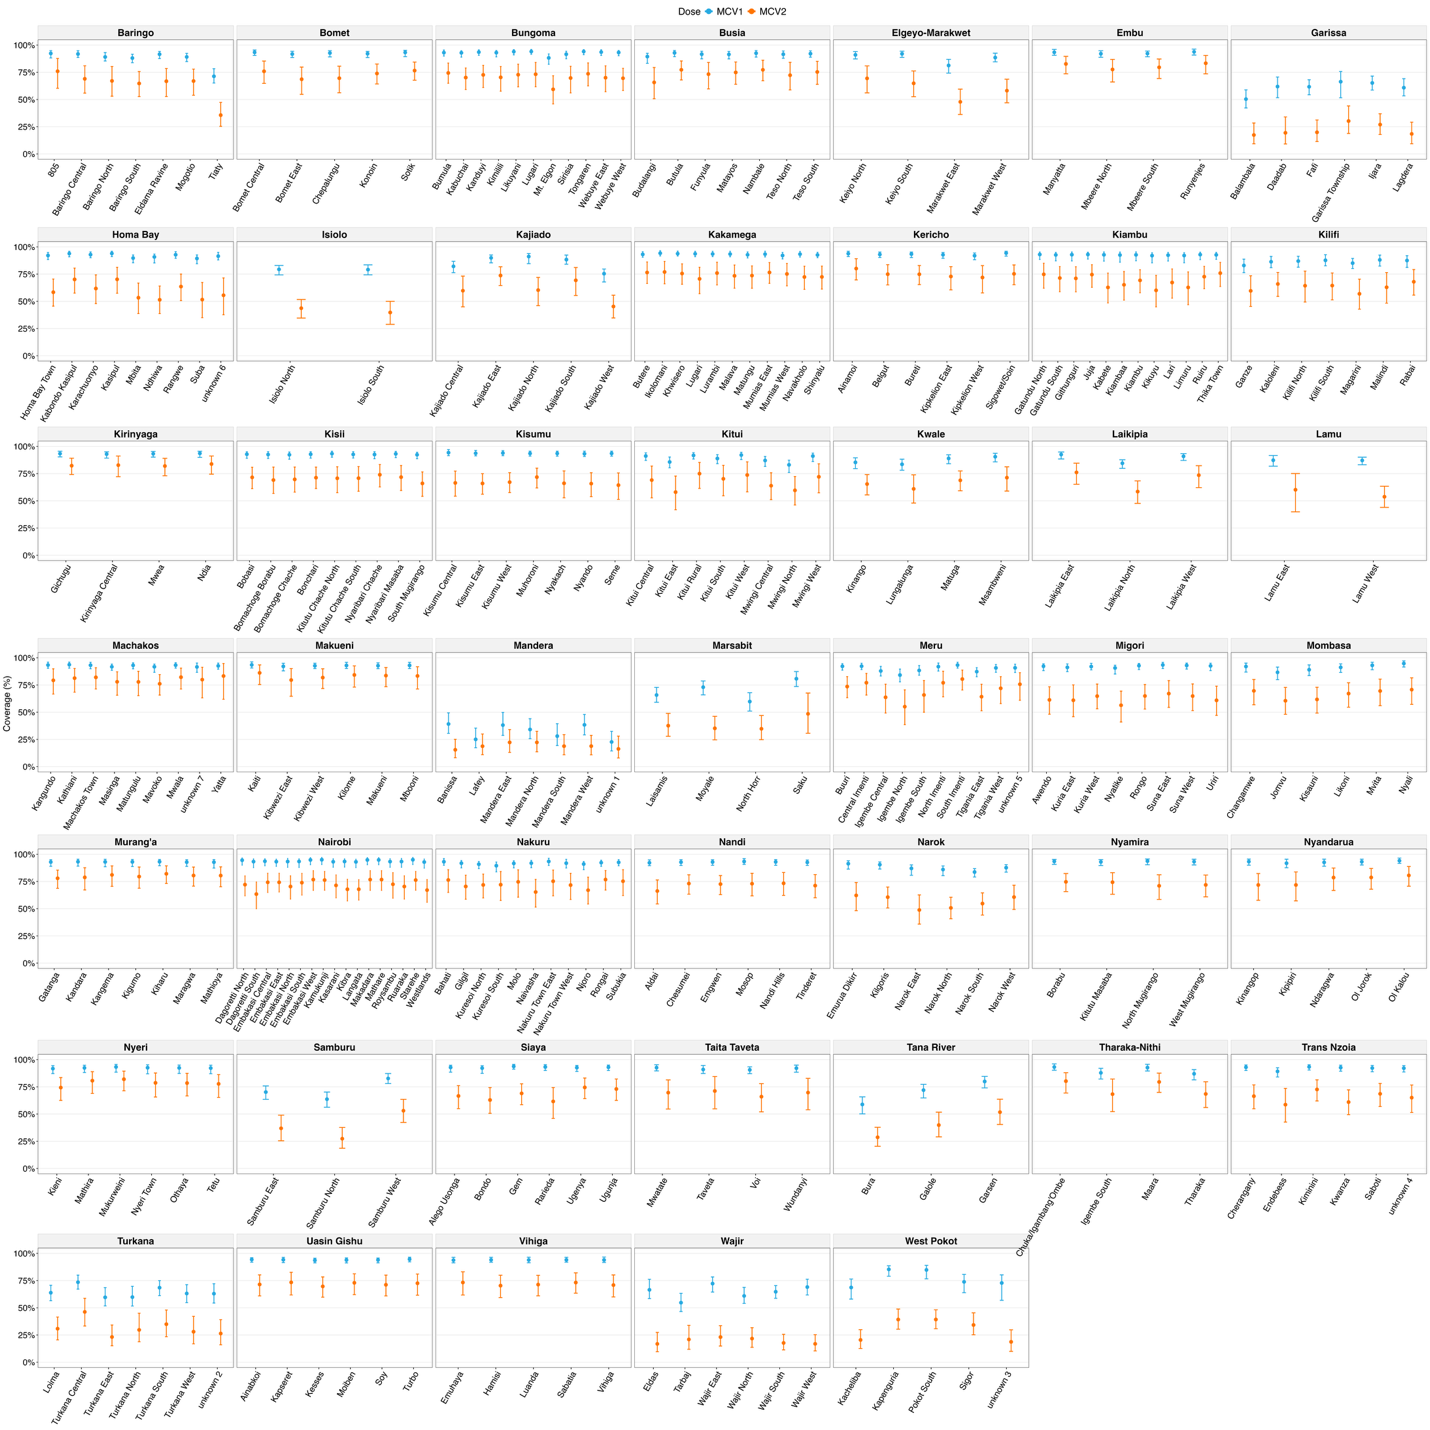


Figure S4: Sub-county level model-based MCV1 and MCV2 coverage estimates with 95% credible intervals, by county. Each panel represents one of the 47 counties. Points indicate posterior mean estimates and error bars represent 95% credible intervals.


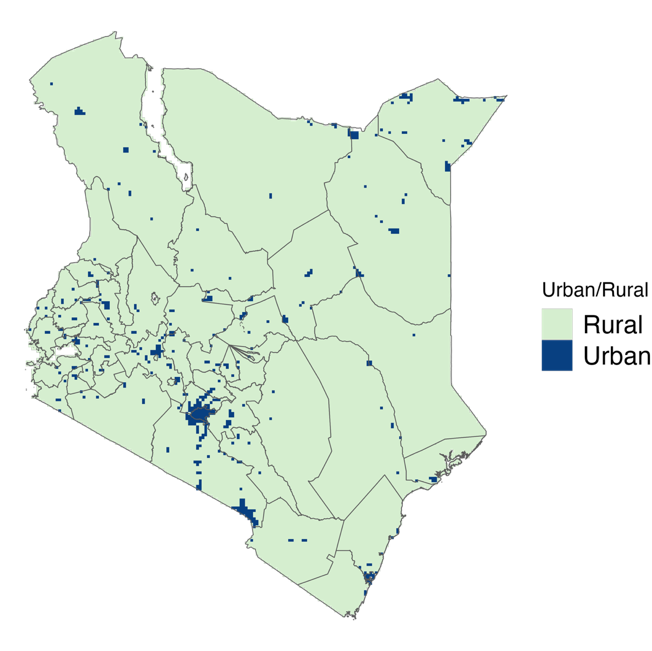


Figure S5:Rural urban classification raster file


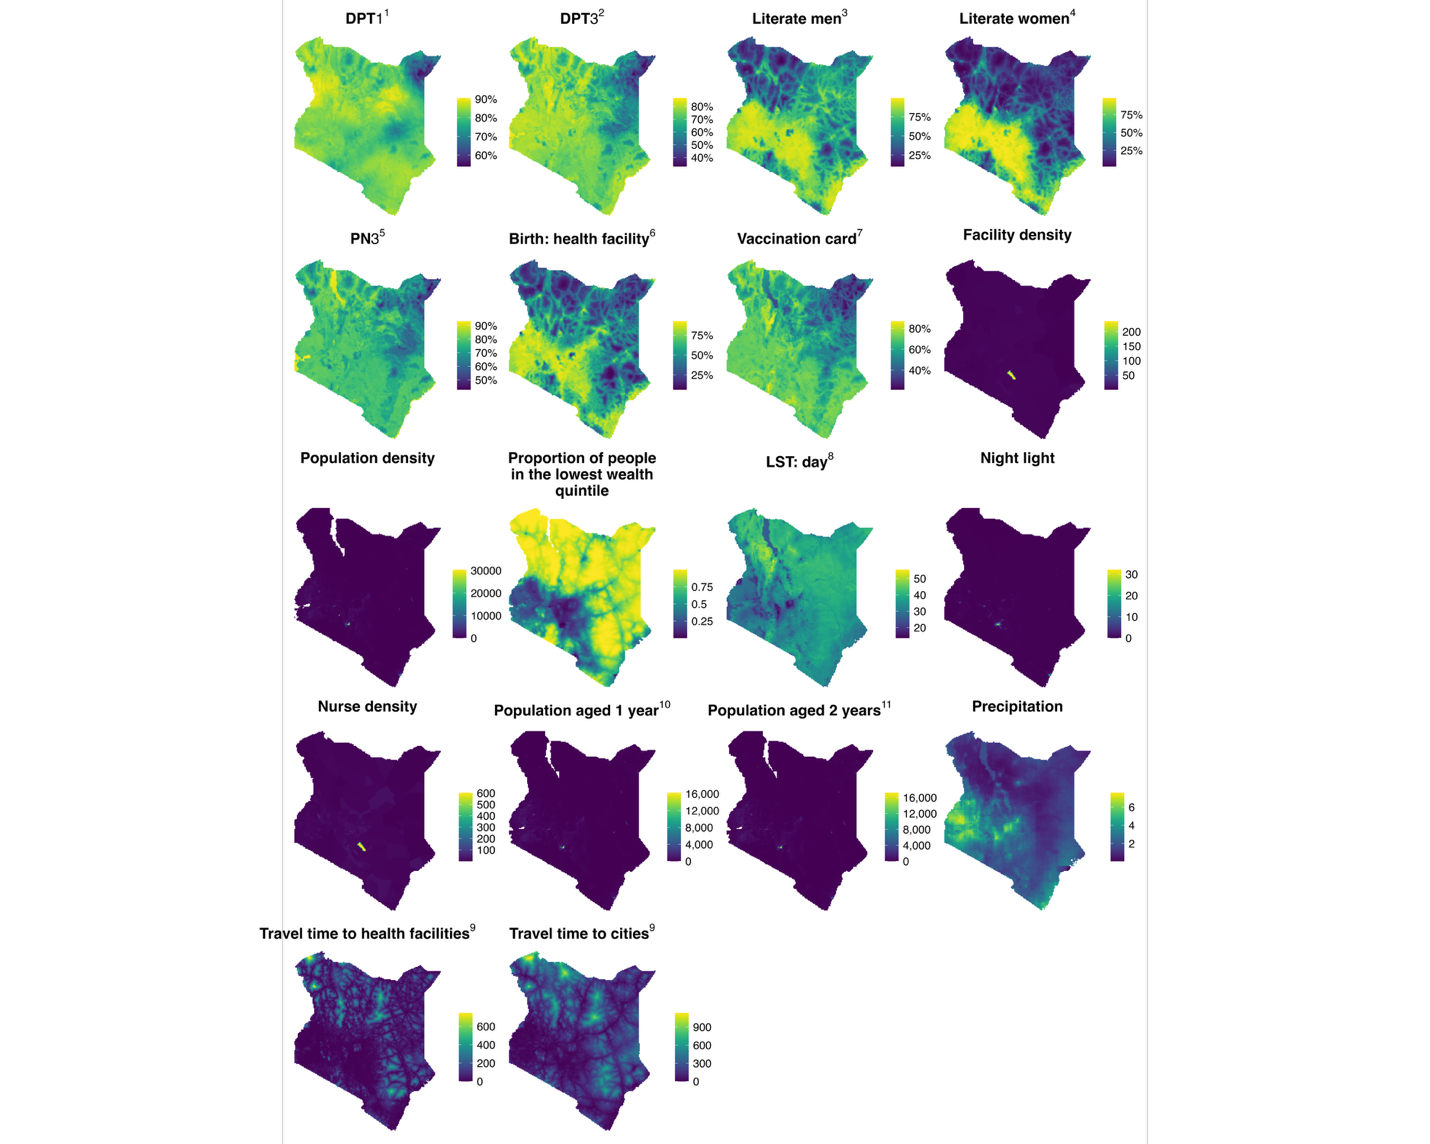


Figure S6: Covariates used in the models

**Number of unvaccinated children**

***Table S6: Number of children aged 12-23 who have not received MCV1 at county level***

| County | Number of unvaccinated children | Lower 95% CI | Upper 95% CI |
| --- | --- | --- | --- |
| Baringo | 3338 | 2667 | 4018 |
| Bomet | 2278 | 1715 | 3086 |
| Bungoma | 4076 | 3138 | 5596 |
| Busia | 2158 | 1640 | 2926 |
| Elgeyo-Marakwet | 1694 | 1287 | 2163 |
| Embu | 894 | 622 | 1224 |
| Garissa | 14612 | 12410 | 16937 |
| Homa Bay | 2745 | 2143 | 3668 |
| Isiolo | 1030 | 854 | 1255 |
| Kajiado | 3636 | 2943 | 4655 |
| Kakamega | 4282 | 3206 | 5467 |
| Kericho | 1967 | 1506 | 2691 |
| Kiambu | 3016 | 2088 | 4834 |
| Kilifi | 5402 | 3887 | 7219 |
| Kirinyaga | 843 | 603 | 1231 |
| Kisii | 2966 | 2143 | 4254 |
| Kisumu | 2008 | 1434 | 2576 |
| Kitui | 4048 | 3132 | 5335 |
| Kwale | 3533 | 2595 | 4693 |
| Laikipia | 1334 | 1046 | 1745 |
| Lamu | 373 | 288 | 490 |
| Machakos | 2239 | 1684 | 3032 |
| Makueni | 1928 | 1338 | 2469 |
| Mandera | 40742 | 35660 | 45338 |
| Marsabit | 2821 | 2345 | 3327 |
| Meru | 4437 | 3259 | 5775 |
| Migori | 2938 | 2195 | 4077 |
| Mombasa | 1678 | 1072 | 2473 |
| Murang'a | 1627 | 1169 | 2426 |
| Nairobi | 6361 | 4108 | 10622 |
| Nakuru | 4925 | 3801 | 6694 |
| Nandi | 2338 | 1761 | 3048 |
| Narok | 5560 | 4614 | 7177 |
| Nyamira | 1379 | 1017 | 1970 |
| Nyandarua | 1211 | 857 | 1662 |
| Nyeri | 1166 | 821 | 1769 |
| Samburu | 2895 | 2465 | 3372 |
| Siaya | 2119 | 1620 | 2991 |
| Taita Taveta | 723 | 521 | 944 |
| Tana River | 3973 | 3421 | 4677 |
| Tharaka-Nithi | 910 | 636 | 1241 |
| Trans Nzoia | 2683 | 2025 | 3659 |
| Turkana | 9412 | 7916 | 11063 |
| Uasin Gishu | 2018 | 1491 | 2802 |
| Vihiga | 1159 | 734 | 1561 |
| Wajir | 14631 | 12636 | 16835 |
| West Pokot | 5362 | 4174 | 7224 |

*Table S7: Number of children aged 24:35 who have not received MCV2 at county level*

| County | Number of unvaccinated children | Lower 95% CI | Upper 95% CI |
| --- | --- | --- | --- |
| Baringo | 9891 | 8186 | 11627 |
| Bomet | 8862 | 6599 | 11577 |
| Bungoma | 17488 | 13539 | 22064 |
| Busia | 7205 | 5212 | 9367 |
| Elgeyo-Marakwet | 6277 | 5095 | 7514 |
| Embu | 2534 | 1727 | 3579 |
| Garissa | 31351 | 28354 | 33751 |
| Homa Bay | 14564 | 11844 | 17505 |
| Isiolo | 3055 | 2691 | 3451 |
| Kajiado | 10097 | 8037 | 12232 |
| Kakamega | 17576 | 13384 | 21852 |
| Kericho | 7690 | 5738 | 9880 |
| Kiambu | 13463 | 10022 | 17092 |
| Kilifi | 15530 | 12045 | 19404 |
| Kirinyaga | 2304 | 1405 | 3339 |
| Kisii | 12607 | 9156 | 15962 |
| Kisumu | 11019 | 8689 | 13490 |
| Kitui | 12130 | 9113 | 15379 |
| Kwale | 9399 | 7366 | 11596 |
| Laikipia | 4051 | 3126 | 5078 |
| Lamu | 1417 | 1129 | 1717 |
| Machakos | 6520 | 4327 | 9164 |
| Makueni | 4828 | 3138 | 6890 |
| Mandera | 52349 | 48352 | 56052 |
| Marsabit | 6005 | 5217 | 6720 |
| Meru | 13807 | 10300 | 18046 |
| Migori | 14760 | 11671 | 18039 |
| Mombasa | 7048 | 4991 | 9350 |
| Murang'a | 4953 | 3286 | 6883 |
| Nairobi | 29892 | 22565 | 38727 |
| Nakuru | 18013 | 14089 | 22813 |
| Nandi | 9845 | 7634 | 12318 |
| Narok | 20336 | 17394 | 23421 |
| Nyamira | 5796 | 4136 | 7745 |
| Nyandarua | 4480 | 3230 | 5886 |
| Nyeri | 3514 | 2443 | 4807 |
| Samburu | 6796 | 5905 | 7581 |
| Siaya | 10393 | 8166 | 12862 |
| Taita Taveta | 2799 | 1936 | 3756 |
| Tana River | 8355 | 7429 | 9259 |
| Tharaka-Nithi | 2557 | 1779 | 3459 |
| Trans Nzoia | 12374 | 9397 | 15729 |
| Turkana | 19374 | 16979 | 21346 |
| Uasin Gishu | 10291 | 7916 | 13158 |
| Vihiga | 5818 | 4217 | 7530 |
| Wajir | 34935 | 32396 | 37060 |
| West Pokot | 17681 | 15923 | 19256 |

**References**

1. WorldPop :: Population Counts.

2. WorldPop :: Age and sex structures.

3. LP DAAC - MOD11A2.

4. WorldPop :: Geospatial covariate data layers.

5. Weiss, D. J. *et al.* A global map of travel time to cities to assess inequalities in accessibility in 2015. *Nature* **553**, 333–336 (2018).

6. Weiss, D. J. *et al.* Global maps of travel time to healthcare facilities. *Nat. Med.* **26**, 1835–1838 (2020).

7. Funk, C. *et al.* The climate hazards infrared precipitation with stations - A new environmental record for monitoring extremes. *Sci. Data* **2**, (2015).

8. Spatial Data Repository, The Demographic and Health Surveys Program. *Modeled Surfaces. KE2022DHS_EDLITRWLIT_MS_v01*. https://spatialdata.dhsprogram.com.

9. Spatial Data Repository, The Demographic and Health Surveys Program. *Modeled Surfaces. KE2022DHS_EDLITRMLIT_MS_v01*. https://spatialdata.dhsprogram.com.

10. Spatial Data Repository, The Demographic and Health Surveys Program. *Modeled Surfaces. KE2022DHS_WSTLETPNFC_MS_v01*. https://spatialdata.dhsprogram.com.

11. Spatial Data Repository, The Demographic and Health Surveys Program. *Modeled Surfaces. KE2022DHS_RHDELPCDHF_MS_v01*. https://spatialdata.dhsprogram.com.

12. Spatial Data Repository, The Demographic and Health Surveys Program. *Modeled Surfaces.KE2022DHS_CHVACCCPN3_MS_v01*. https://spatialdata.dhsprogram.com.

13. Spatial Data Repository, The Demographic and Health Surveys Program. *Modeled Surfaces.KE2022DHS_CHVACCCDP3_MS_v01*. https://spatialdata.dhsprogram.com.

14. Spatial Data Repository, The Demographic and Health Surveys Program. *Modeled Surfaces.KE2022DHS_CHVACCCDP1_MS_v01*. https://spatialdata.dhsprogram.com.

15. Spatial Data Repository, The Demographic and Health Surveys Program. *Modeled Surfaces.KE2022DHS_CHVAC1CVCD_MS_v01*. https://spatialdata.dhsprogram.com.

16. Sub-national estimates of incidence of visceral leishmaniasis and optimisation of geographical accessibility to treatment centres in Kenya | Research Square. https://www.researchsquare.com/article/rs-8967363/v1.

17. MINISTRY OF HEALTH. *KENYA HEALTH FACILITY CENSUS REPORT REPORT*. https://www.health.go.ke/sites/default/files/2024-01/Kenya%20Health%20Facility%20Census%20Report%20September%202023.pdf (2023).

18. Diggle, P. J. & Giorgi, E. *Model-Based Geostatistics for Global Public Health: Methods and Applications*. (Chapman and Hall/CRC, New York, 2019). doi:10.1201/9781315188492.

19. Czado, C., Gneiting, T. & Held, L. Predictive Model Assessment for Count Data. *Biometrics* **65**, 1254–1261 (2009).

20. Giorgi, E. *et al.* Model building and assessment of the impact of covariates for disease prevalence mapping in low-resource settings: to explain and to predict. *J. R. Soc. Interface* **18**, 20210104 (2021).
